# Supplementary material for: Hillslope-scale experiment demonstrates the role of convergence during two-step saturation
Source: Copernicus journal article supplement (doi:10.5194/hess-18-3681-2014), 2014-09-24
Supplement: Supplementary file 1 [file hess-18-3681-2014-supplement.zip]

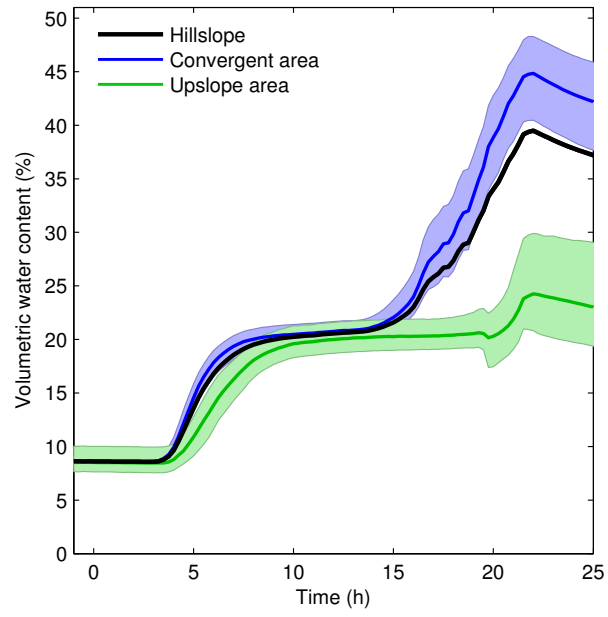

**Figure S1.** Volumetric water content data at 35 cm depth is averaged over the hillslope, the convergent area and the upslope area. The 95% bootstrapping confidence intervals of the means over the convergent and upslope areas are also shown. Time is relative to the start of the rainfall event.
