# Supplementary material for: Hillslope-scale experiment demonstrates the role of convergence during two-step saturation
Source: Copernicus journal article supplement (doi:10.5194/hess-18-3681-2014), 2014-09-24
Supplement: Supplementary file 2 [file hess-18-3681-2014-supplement.zip]

Archive with 4 entries (4 files):
- Animation S1 caption.pdf
- supplement-cover-letter.pdf
- Figure S1.pdf
- Animation S1.avi
