# Supplementary material for: Hillslope-scale experiment demonstrates the role of convergence during two-step saturation
Source: Copernicus journal article supplement (doi:10.5194/hess-18-3681-2014), 2014-09-24
Supplement: Supplementary file 4 [file hess-18-3681-2014-supplement.zip]

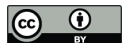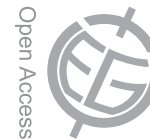

## *Supplement of*

# **Hillslope-scale experiment demonstrates the role of convergence during two-step saturation**

**A. I. Gevaert et al.**

*Correspondence to:* A. I. Gevaert (a.i.gevaert@vu.nl)

- Supplement-Cover-Letter.pdf
- Animation S1 caption.pdf
- Animation S1.avi
- Figure S1.pdf
